# Supplementary material for: Royal Decree: Gene Expression in Trans-Generationally Immune Primed Bumblebee Workers Mimics a Primary Immune Response
Source: PubMed Central journal article supplement (PMC4956190; doi:10.1371/journal.pone.0159635), 2016-07-21
Supplement: pone.0159635.s002.pdf [file pone.0159635.s002.pdf]

Scaffold: NC\_015764.1

14.15 mb

14.16 mb

14.155 mb

14.165 mb

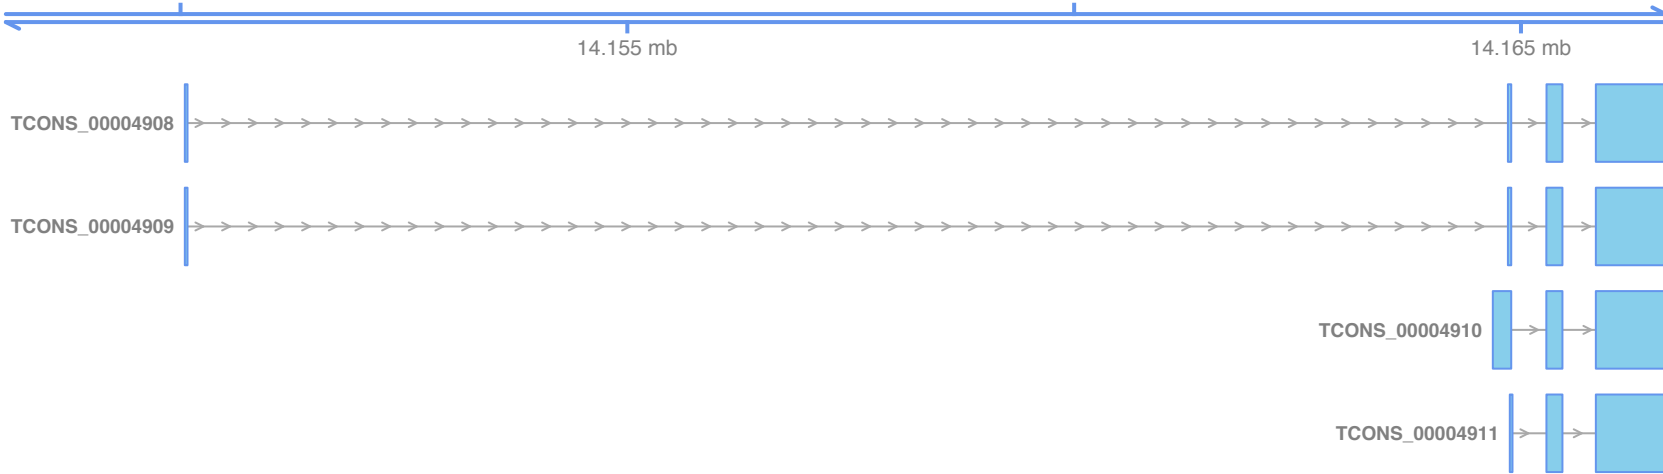

abaecin:  
LOC100631078
