# Supplementary material for: Royal Decree: Gene Expression in Trans-Generationally Immune Primed Bumblebee Workers Mimics a Primary Immune Response
Source: PubMed Central journal article supplement (PMC4956190; doi:10.1371/journal.pone.0159635), 2016-07-21
Supplement: pone.0159635.s003.pdf [file pone.0159635.s003.pdf]

Scaffold: NW\_003566286.1

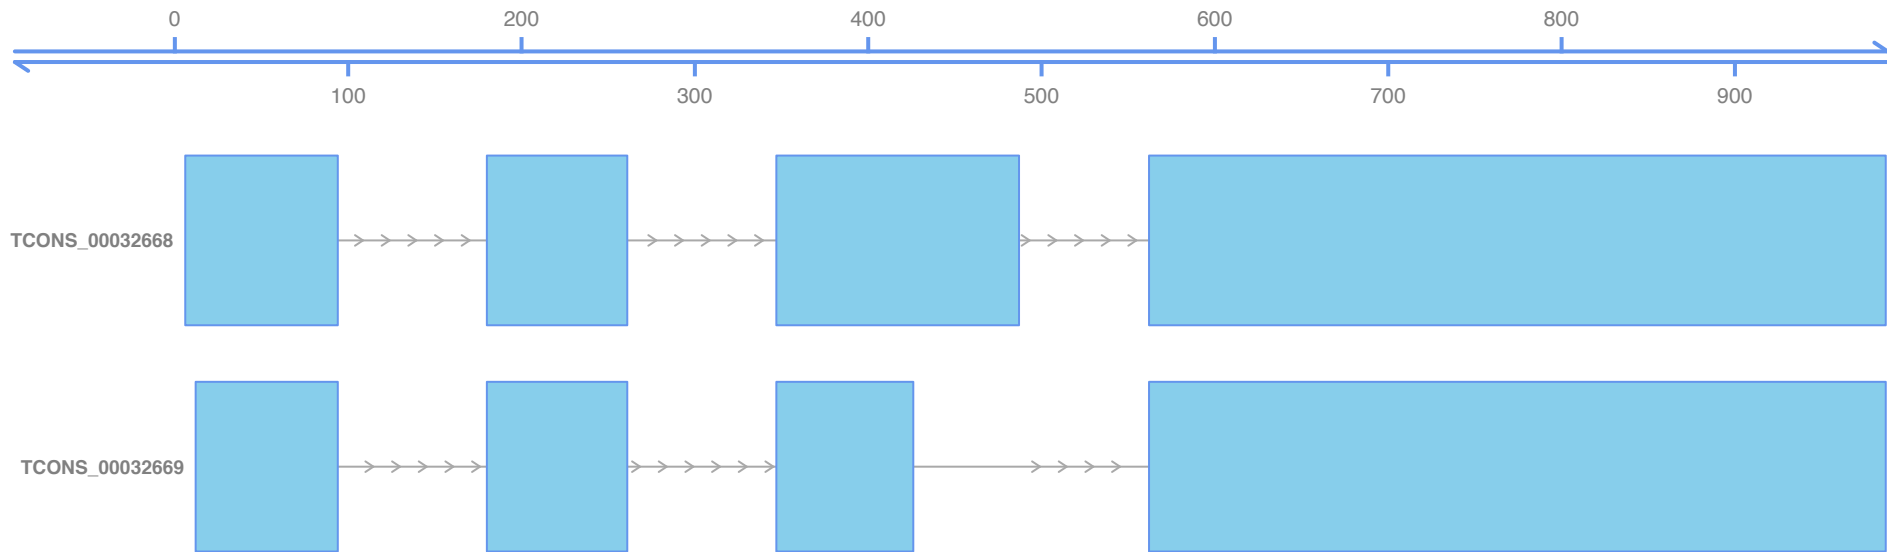

apidaecin  
73a:  
LOC100649867
