# Supplementary material for: Royal Decree: Gene Expression in Trans-Generationally Immune Primed Bumblebee Workers Mimics a Primary Immune Response
Source: PubMed Central journal article supplement (PMC4956190; doi:10.1371/journal.pone.0159635), 2016-07-21

Scaffold: NC\_015765.1

11.16 mb

11.17 mb

11.18 mb

11.19 mb

11.2 mb

dscam: LOC100649765

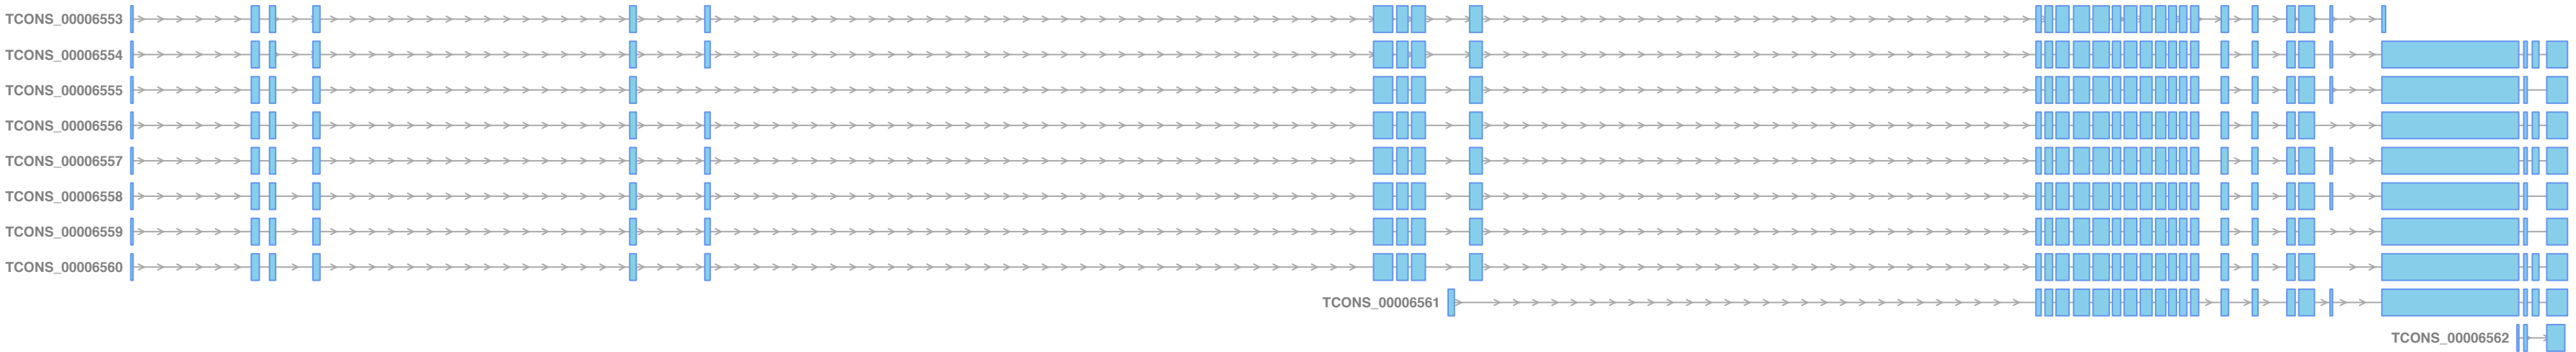

Supplement: pone.0159635.s006.pdf [file pone.0159635.s006.pdf]
