# Supplementary material for: Royal Decree: Gene Expression in Trans-Generationally Immune Primed Bumblebee Workers Mimics a Primary Immune Response
Source: PubMed Central journal article supplement (PMC4956190; doi:10.1371/journal.pone.0159635), 2016-07-21
Supplement: pone.0159635.s007.pdf [file pone.0159635.s007.pdf]

| gene                        | t-statistic | p value | primer f                 | primer r                 |
|-----------------------------|-------------|---------|--------------------------|--------------------------|
| Abaecin: LOC100631078       | 0.233       | 0.830   | GCCACAATATGTGGAATCCT     | ATGACCAGGGTTTGGTAATG     |
| Alaserpin: LOC100648602     | 0.667       | 0.530   | TGCTGAAATGCTAGATGACACG   | GCATATCGCTCGTTAACTCAGG   |
| Apidaecin: LOC100649867     | 0.025       | 0.981   | CGTGTTGTGTGCAGTCGGTAATTC | GTCTGCGTGAAAGTTCAAGGCTTC |
| Argonaut 2: LOC100647036    | 0.930       | 0.397   | AATTGCAAGATCAACCTGCC     | CCTACCCAAAGACAAGGCAA     |
| Aubergine: LOC100646008     | 0.145       | 0.890   | GTCGCCCTTCTGCATATCTC     | AAGATCGAACTGCTATCCGC     |
| Basket:LOC100631091         | 1.239       | 0.285   | GGAACAAGATAATCGAGCAACTG  | CTGGCTTTC AATCGGTTGTG    |
| BGRP1: LOC100647662         | 1.108       | 0.333   | AACGTGGAAGTCAAAGATGG     | GCGAACGATGACTTGGTATT     |
| Decay: LOC100646875         | 2.611       | 0.063   | AAGAAGACCTCGGTCCTTAGA    | CAGCTGCAAATGAAGTAATGCG   |
| Ferritin: LOC105666120      | 1.456       | 0.233   | AAAGAATTGGACGCAAATGG     | CAGCGAACTGATGTCCAAGA     |
| Hymenoptaecin: LOC100631061 | 0.046       | 0.966   | TTCATCGTACTGGCTCTCTTCTG  | AGCCGTAGTATTCTTCCACAGC   |
| PGRP-S1: LOC100651417       | 2.017       | 0.090   | TTTCCATGTTGCTCGCTTCG     | CGCGGTTTCCCTTTCGATATTAG  |
| PGRP.L: LOC100648322        | 2.072       | 0.128   | CAGCCACCTACGACAGATTT     | GTACATTCCGCTTGTGTCTT     |
| PGRP.S3: LOC100651268       | 0.774       | 0.477   | CGTGAAGGAGCTCATACCAT     | CCAGGACTCATAGTGGCTGT     |
| PGRP.SC2: LOC105666394      | 1.729       | 0.149   | TTGGTTGGCGAAGATGGAAAC    | CGCGCTTGGATTATGACCAAC    |
| Relish: LOC100631072        | 1.164       | 0.323   | CAGCAGTAAAAATCCCCGAC     | CAGCACGAATAAGTGAACATA    |
| serpin27a: LOC100644115     | 1.086       | 0.354   | CCGATCATCCATTCGTATTC     | ACCTGCACTTGATATCCCTG     |
| SPN_3.4A: LOC100648482      | -2.312      | 0.066   | GCAGAGACAAATGTTGAAGCAC   | CACAGTCTGGGATAATGAAGAACC |
| SPN_3.4B: LOC100648717      | -0.552      | 0.609   | ATGGTGCTTTGTTTCATCAGTCG  | GACCCAATGACAGCAGTAACAG   |
| tepA: LOC100631073          | 1.667       | 0.165   | GCGTTCTATGACCACCTGTT     | TACAGGTTACTCCACAGCCC     |
| Transferrin: LOC100650460   | 0.277       | 0.794   | CAATTTCTTCACCGCATCCT     | CCTCGTTATTTGGCTTGCAT     |
| Vitellogenin: LOC100649042  | 0.930       | 0.393   | GTGACAAGCGAAGAGACTATTATG | CCGTGTTATCTGGCGTGAC      |
