# Supplementary material for: Royal Decree: Gene Expression in Trans-Generationally Immune Primed Bumblebee Workers Mimics a Primary Immune Response
Source: PubMed Central journal article supplement (PMC4956190; doi:10.1371/journal.pone.0159635), 2016-07-21
Supplement: pone.0159635.s008.pdf [file pone.0159635.s008.pdf]

| xloc        | gene                      | sample_1 | sample_2 | status | FPKM_1  | FPKM_2  | log2_fold_chtest_stat | p_value  | q_value  | significant |     |
|-------------|---------------------------|----------|----------|--------|---------|---------|-----------------------|----------|----------|-------------|-----|
| XLOC_000088 | LOC100649912              | NA_      | NN       | OK     | 36.1649 | 77.5923 | 1.10132               | 3.18328  | 5.00E-05 | 0.00345316  | yes |
| XLOC_000103 | LOC100642949              | NA_      | NN       | OK     | 28.7527 | 17.1451 | -0.745901             | -2.06283 | 3.00E-04 | 0.015594    | yes |
| XLOC_000112 | LOC100645359              | NA_      | NN       | OK     | 63.2226 | 37.9806 | -0.735177             | -2.08301 | 0.00025  | 0.0135134   | yes |
| XLOC_000138 | LOC100643639              | NA_      | NN       | OK     | 41.5701 | 18.9828 | -1.13086              | -2.2712  | 4.00E-04 | 0.0197472   | yes |
| XLOC_000139 | LOC100644116              | NA_      | NN       | OK     | 30.8348 | 4.16192 | -2.88924              | -3.75106 | 5.00E-05 | 0.00345316  | yes |
| XLOC_000148 | LOC100645819              | NA_      | NN       | OK     | 99.0927 | 261.619 | 1.40062               | 3.86495  | 5.00E-05 | 0.00345316  | yes |
| XLOC_000160 | LOC100647603              | NA_      | NN       | OK     | 37.4934 | 13.4829 | -1.4755               | -2.81572 | 5.00E-05 | 0.00345316  | yes |
| XLOC_000233 | LOC100645975,LOC100646094 | NA_      | NN       | OK     | 25.0159 | 42.4212 | 0.761938              | 1.88154  | 9.00E-04 | 0.0374257   | yes |
| XLOC_000245 | LOC100648892              | NA_      | NN       | OK     | 202.886 | 93.0689 | -1.1243               | -2.94237 | 5.00E-05 | 0.00345316  | yes |
| XLOC_000297 | LOC100648083              | NA_      | NN       | OK     | 45.1809 | 82.6045 | 0.870509              | 2.47907  | 5.00E-05 | 0.00345316  | yes |
| XLOC_000341 | NA                        | NA_      | NN       | OK     | 45.8117 | 77.0146 | 0.749417              | 2.07243  | 0.00035  | 0.0178855   | yes |
| XLOC_000450 | LOC100643875              | NA_      | NN       | OK     | 90.0471 | 30.8937 | -1.54337              | -2.56807 | 5.00E-05 | 0.00345316  | yes |
| XLOC_000468 | LOC100643149              | NA_      | NN       | OK     | 587.442 | 1920.66 | 1.70908               | 3.07884  | 5.00E-05 | 0.00345316  | yes |
| XLOC_000469 | LOC100643108              | NA_      | NN       | OK     | 1742.34 | 526.519 | -1.72647              | -2.63558 | 2.00E-04 | 0.0111481   | yes |
| XLOC_000482 | LOC100642553              | NA_      | NN       | OK     | 76.9878 | 46.4857 | -0.727842             | -2.12067 | 0.00045  | 0.0216446   | yes |
| XLOC_000496 | LOC100644873              | NA_      | NN       | OK     | 10.9412 | 6.19469 | -0.820662             | -2.16902 | 0.00015  | 0.00897192  | yes |
| XLOC_000536 | LOC100646612              | NA_      | NN       | OK     | 27.9357 | 14.7883 | -0.917656             | -2.42585 | 1.00E-04 | 0.00631785  | yes |
| XLOC_000562 | NA                        | NA_      | NN       | OK     | 32.4062 | 15.8885 | -1.02828              | -1.90116 | 0.0012   | 0.0473458   | yes |
| XLOC_000563 | LOC100650142              | NA_      | NN       | OK     | 15.1551 | 6.34424 | -1.25629              | -2.74552 | 5.00E-05 | 0.00345316  | yes |
| XLOC_000596 | LOC100647835              | NA_      | NN       | OK     | 262.41  | 153.065 | -0.777681             | -2.14948 | 5.00E-05 | 0.00345316  | yes |
| XLOC_000619 | LOC100645702              | NA_      | NN       | OK     | 84.0826 | 18.5336 | -2.18167              | -5.3669  | 5.00E-05 | 0.00345316  | yes |
| XLOC_000643 | LOC100643069              | NA_      | NN       | OK     | 5.7589  | 2.77817 | -0.897673             | -1.83018 | 0.00125  | 0.0489743   | yes |
| XLOC_000650 | LOC100651433              | NA_      | NN       | OK     | 34.2842 | 54.6663 | 0.673108              | 1.89494  | 0.001    | 0.0408069   | yes |
| XLOC_000671 | LOC100646372              | NA_      | NN       | OK     | 23.7831 | 11.9313 | -0.995192             | -2.46244 | 5.00E-05 | 0.00345316  | yes |
| XLOC_000686 | LOC100650632              | NA_      | NN       | OK     | 56.2456 | 21.4993 | -1.38745              | -2.87861 | 5.00E-05 | 0.00345316  | yes |
| XLOC_000699 | LOC100643233              | NA_      | NN       | OK     | 13.239  | 3.85755 | -1.77904              | -2.42487 | 0.00025  | 0.0135134   | yes |
| XLOC_000709 | LOC100645433              | NA_      | NN       | OK     | 8.53215 | 24.0767 | 1.49666               | 3.58653  | 5.00E-05 | 0.00345316  | yes |
| XLOC_000712 | LOC100646253              | NA_      | NN       | OK     | 76.879  | 44.9033 | -0.775767             | -2.21091 | 0.00055  | 0.0255477   | yes |
| XLOC_000713 | LOC100646373              | NA_      | NN       | OK     | 1113.86 | 1980.74 | 0.830476              | 1.907368 | 7.00E-04 | 0.0307351   | yes |
| XLOC_000730 | LOC100649684,LOC100649799 | NA_      | NN       | OK     | 256.529 | 531.975 | 1.05223               | 2.63626  | 5.00E-05 | 0.00345316  | yes |
| XLOC_000761 | LOC100649801              | NA_      | NN       | OK     | 137.819 | 232.417 | 0.753935              | 2.20269  | 3.00E-04 | 0.015594    | yes |
| XLOC_000762 | LOC100650111              | NA_      | NN       | OK     | 287.2   | 1032.83 | 1.84648               | 4.68741  | 5.00E-05 | 0.00345316  | yes |
| XLOC_000776 | LOC100650592              | NA_      | NN       | OK     | 34.2266 | 81.4044 | 1.24999               | 3.03857  | 5.00E-05 | 0.00345316  | yes |
| XLOC_000795 | LOC100645937              | NA_      | NN       | OK     | 10.1536 | 3.82553 | -1.40826              | -2.01882 | 8.00E-04 | 0.0340602   | yes |
| XLOC_000868 | LOC100649615              | NA_      | NN       | OK     | 156.128 | 99.7871 | -0.645802             | -1.78618 | 0.0017   | 0.0626688   | no  |
| XLOC_001055 | LOC100647719              | NA_      | NN       | OK     | 46.0732 | 124.819 | 1.43784               | 3.94388  | 5.00E-05 | 0.00345316  | yes |
| XLOC_001057 | LOC100648085              | NA_      | NN       | OK     | 7.36291 | 4.299   | -0.776276             | -1.86881 | 0.0014   | 0.0532583   | no  |
| XLOC_001088 | LOC100646374              | NA_      | NN       | OK     | 33.0154 | 18.706  | -0.819639             | -2.3583  | 1.00E-04 | 0.00631785  | yes |
| XLOC_001104 | LOC100649988              | NA_      | NN       | OK     | 60.0469 | 258.384 | 2.10536               | 2.38228  | 0.00025  | 0.0135134   | yes |
| XLOC_001180 | LOC100646893              | NA_      | NN       | OK     | 42.4922 | 78.9404 | 0.893566              | 2.5258   | 5.00E-05 | 0.00345316  | yes |
| XLOC_001241 | LOC100648391              | NA_      | NN       | OK     | 597.105 | 1250.65 | 1.06663               | 2.41618  | 5.00E-05 | 0.00345316  | yes |
| XLOC_001309 | LOC100642196              | NA_      | NN       | OK     | 12.6924 | 8.01852 | -0.66256              | -1.93106 | 0.00065  | 0.0289604   | yes |
| XLOC_001320 | LOC100649872              | NA_      | NN       | OK     | 64.5123 | 134.326 | 1.0581                | 1.89178  | 0.00195  | 0.0699171   | no  |
| XLOC_001366 | NA                        | NA_      | NN       | OK     | 11.1345 | 60.9059 | 2.45155               | 4.42876  | 5.00E-05 | 0.00345316  | yes |
| XLOC_001367 | LOC100646942              | NA_      | NN       | OK     | 8.79891 | 18.9872 | 1.10963               | 2.47716  | 1.00E-04 | 0.00631785  | yes |
| XLOC_001394 | LOC100643073              | NA_      | NN       | OK     | 18.1929 | 10.3567 | -0.812813             | -2.20044 | 3.00E-04 | 0.015594    | yes |
| XLOC_001402 | PEPCK                     | NA_      | NN       | OK     | 7.28517 | 80.089  | 3.45857               | 7.7229   | 5.00E-05 | 0.00345316  | yes |
| XLOC_001409 | LOC100650031              | NA_      | NN       | OK     | 8.78054 | 15.821  | 0.849459              | 1.82875  | 0.0015   | 0.0563533   | no  |
| XLOC_001410 | LOC100649919              | NA_      | NN       | OK     | 7.47961 | 14.71   | 0.975758              | 2.12398  | 3.00E-04 | 0.015594    | yes |
| XLOC_001424 | LOC100644009              | NA_      | NN       | OK     | 37.5087 | 16.9133 | -1.14906              | -2.28855 | 2.00E-04 | 0.0111481   | yes |
| XLOC_001475 | LOC100631078              | NA_      | NN       | OK     | 17758.9 | 176.515 | -6.6526               | -10.2647 | 5.00E-05 | 0.00345316  | yes |
| XLOC_001524 | LOC100642680              | NA_      | NN       | OK     | 107.509 | 35.6547 | -1.59229              | -4.1568  | 5.00E-05 | 0.00345316  | yes |
| XLOC_001601 | LOC100644839              | NA_      | NN       | OK     | 139.678 | 241.839 | 0.79194               | 1.97868  | 0.0014   | 0.0532583   | no  |
| XLOC_001602 | LOC100644713              | NA_      | NN       | OK     | 253.998 | 140.852 | -0.850637             | -2.19511 | 2.00E-04 | 0.0111481   | yes |
| XLOC_001631 | NA                        | NA_      | NN       | OK     | 23.9543 | 14.5802 | -0.716271             | -2.10322 | 7.00E-04 | 0.0307351   | yes |
| XLOC_001638 | LOC100646895              | NA_      | NN       | OK     | 49.4352 | 83.31   | 0.752951              | 1.99756  | 6.00E-04 | 0.0273847   | yes |
| XLOC_001695 | LOC100645624              | NA_      | NN       | OK     | 79.765  | 47.4501 | -0.749345             | -1.96032 | 0.00045  | 0.0216446   | yes |
| XLOC_001720 | LOC100644799              | NA_      | NN       | OK     | 7.60584 | 13.4294 | 0.820216              | 2.12769  | 0.00045  | 0.0216446   | yes |
| XLOC_001738 | LOC100650271              | NA_      | NN       | OK     | 24.8304 | 44.9207 | 0.855271              | 2.37473  | 0.00015  | 0.00897192  | yes |
| XLOC_001740 | LOC100649764              | NA_      | NN       | OK     | 39.9057 | 70.2852 | 0.816627              | 2.17184  | 3.00E-04 | 0.015594    | yes |
| XLOC_001747 | LOC100648625              | NA_      | NN       | OK     | 37.4869 | 4.0379  | -3.21471              | -5.2535  | 5.00E-05 | 0.00345316  | yes |
| XLOC_001792 | LOC100649617              | NA_      | NN       | OK     | 8.89311 | 24.5723 | 1.46627               | 3.68087  | 5.00E-05 | 0.00345316  | yes |
| XLOC_001796 | LOC100650678              | NA_      | NN       | OK     | 13.9119 | 6.48602 | -1.10091              | -2.73652 | 5.00E-05 | 0.00345316  | yes |
| XLOC_001834 | LOC100645983              | NA_      | NN       | OK     | 15.5262 | 9.96753 | -0.639399             | -1.73946 | 0.00205  | 0.072445    | no  |
| XLOC_001962 | LOC100651716              | NA_      | NN       | OK     | 105.389 | 20.1782 | -2.38485              | -5.28665 | 5.00E-05 | 0.00345316  | yes |
| XLOC_001977 | LOC100646701              | NA_      | NN       | OK     | 161.725 | 285.409 | 0.81949               | 2.21543  | 1.00E-04 | 0.00631785  | yes |
| XLOC_002035 | LOC100648933              | NA_      | NN       | OK     | 4.15763 | 9.85023 | 1.24439               | 2.29826  | 2.00E-04 | 0.0111481   | yes |
| XLOC_002038 | LOC100642443              | NA_      | NN       | OK     | 13798.6 | 192.525 | -6.16334              | -10.1642 | 5.00E-05 | 0.00345316  | yes |
| XLOC_002054 | LOC100642321              | NA_      | NN       | OK     | 38.6292 | 63.7733 | 0.723259              | 1.86805  | 0.0019   | 0.0685623   | no  |
| XLOC_002073 | LOC100649725              | NA_      | NN       | OK     | 5.27713 | 2.1109  | -1.3219               | -2.67351 | 5.00E-05 | 0.00345316  | yes |
| XLOC_002076 | LOC100642442              | NA_      | NN       | OK     | 110.711 | 30.1485 | -1.87664              | -5.22725 | 5.00E-05 | 0.00345316  | yes |
| XLOC_002090 | LOC100646102              | NA_      | NN       | OK     | 13.03   | 5.56462 | -1.22749              | -2.15217 | 4.00E-04 | 0.0197472   | yes |
| XLOC_002097 | LOC100647494              | NA_      | NN       | OK     | 62.4577 | 38.0447 | -0.715184             | -2.04811 | 7.00E-04 | 0.0307351   | yes |
| XLOC_002106 | LOC100645439              | NA_      | NN       | OK     | 3.9184  | 1.47368 | -1.41084              | -2.06617 | 5.00E-05 | 0.00345316  | yes |
| XLOC_002125 | LOC100645190              | NA_      | NN       | OK     | 3.16763 | 11.215  | 1.82396               | 3.02342  | 5.00E-05 | 0.00345316  | yes |

|             |                           |     |    |    |         |          |           |          |          |            |     |
|-------------|---------------------------|-----|----|----|---------|----------|-----------|----------|----------|------------|-----|
| XLOC_002155 | LOC100649207              | NA_ | NN | OK | 57.6856 | 19.4528  | -1.56823  | -4.40884 | 5.00E-05 | 0.00345316 | yes |
| XLOC_002177 | VSP                       | NA_ | NN | OK | 714.886 | 178.686  | -2.00029  | -5.45478 | 5.00E-05 | 0.00345316 | yes |
| XLOC_002178 | LOC100642484              | NA_ | NN | OK | 7.17387 | 72.5504  | 3.33816   | 5.06608  | 5.00E-05 | 0.00345316 | yes |
| XLOC_002180 | LOC100652274              | NA_ | NN | OK | 14.3656 | 70.8352  | 2.30185   | 5.28543  | 5.00E-05 | 0.00345316 | yes |
| XLOC_002181 | LOC100652157              | NA_ | NN | OK | 21.6833 | 77.6753  | 1.84087   | 4.35993  | 5.00E-05 | 0.00345316 | yes |
| XLOC_002182 | LOC100652036              | NA_ | NN | OK | 6.59034 | 36.2327  | 2.45887   | 4.4957   | 5.00E-05 | 0.00345316 | yes |
| XLOC_002183 | LOC100651916              | NA_ | NN | OK | 42.1512 | 232.48   | 2.46346   | 6.29643  | 5.00E-05 | 0.00345316 | yes |
| XLOC_002187 | LOC100650999              | NA_ | NN | OK | 10.0223 | 5.13668  | -0.964305 | -2.06995 | 0.00035  | 0.0178855  | yes |
| XLOC_002189 | NA                        | NA_ | NN | OK | 44.0079 | 16.1225  | -1.44869  | -2.85326 | 5.00E-05 | 0.00345316 | yes |
| XLOC_002191 | NA                        | NA_ | NN | OK | 688.435 | 3232.34  | 2.23119   | 2.84739  | 5.00E-05 | 0.00345316 | yes |
| XLOC_002192 | LOC100650318              | NA_ | NN | OK | 75.386  | 48.0179  | -0.650726 | -1.82708 | 0.0016   | 0.0596539  | no  |
| XLOC_002219 | LOC100643115              | NA_ | NN | OK | 2109.01 | 708.973  | -1.57276  | -3.5926  | 5.00E-05 | 0.00345316 | yes |
| XLOC_002226 | LOC100652273              | NA_ | NN | OK | 7.16726 | 2.63609  | -1.44302  | -2.31337 | 4.00E-04 | 0.0197472  | yes |
| XLOC_002267 | LOC100642684              | NA_ | NN | OK | 5.96195 | 0.364454 | -4.03198  | -3.61601 | 0.00035  | 0.0178855  | yes |
| XLOC_002269 | LOC100642921              | NA_ | NN | OK | 222.717 | 104.564  | -1.09083  | -3.08922 | 5.00E-05 | 0.00345316 | yes |
| XLOC_002299 | LOC100651675              | NA_ | NN | OK | 12.0638 | 6.73673  | -0.840561 | -2.10429 | 2.00E-04 | 0.0111481  | yes |
| XLOC_002394 | LOC100649375              | NA_ | NN | OK | 64.3413 | 41.2587  | -0.641049 | -1.81798 | 0.00175  | 0.0640314  | no  |
| XLOC_002417 | LOC100643929              | NA_ | NN | OK | 14.4415 | 5.00473  | -1.52886  | -2.82987 | 5.00E-05 | 0.00345316 | yes |
| XLOC_002585 | LOC100649054              | NA_ | NN | OK | 38.3653 | 20.122   | -0.931025 | -2.10333 | 4.00E-04 | 0.0197472  | yes |
| XLOC_002599 | LOC100642803              | NA_ | NN | OK | 132.234 | 213.715  | 0.692592  | 2.20251  | 5.00E-04 | 0.0235311  | yes |
| XLOC_002649 | LOC100644638,LOC100644886 | NA_ | NN | OK | 1210.44 | 305.54   | -1.9861   | -3.61882 | 5.00E-05 | 0.00345316 | yes |
| XLOC_002650 | NA                        | NA_ | NN | OK | 177.808 | 19.2463  | -3.20767  | -5.73953 | 5.00E-05 | 0.00345316 | yes |
| XLOC_002659 | LOC100642635,LOC100642754 | NA_ | NN | OK | 60.4266 | 35.6291  | -0.762129 | -2.07513 | 0.00045  | 0.0216446  | yes |
| XLOC_002665 | LOC100651196              | NA_ | NN | OK | 33.2348 | 74.0817  | 1.15642   | 2.91283  | 5.00E-05 | 0.00345316 | yes |
| XLOC_002714 | LOC100647727              | NA_ | NN | OK | 22.1191 | 11.0408  | -1.00245  | -2.19081 | 4.00E-04 | 0.0197472  | yes |
| XLOC_002729 | LOC100643887              | NA_ | NN | OK | 5.67709 | 3.1043   | -0.870881 | -1.79904 | 0.00205  | 0.072445   | no  |
| XLOC_002765 | LOC100645002              | NA_ | NN | OK | 122.277 | 228.7    | 0.903299  | 2.56895  | 5.00E-05 | 0.00345316 | yes |
| XLOC_002767 | LOC100644169              | NA_ | NN | OK | 292.74  | 479.361  | 0.711493  | 2.00067  | 5.00E-04 | 0.0235311  | yes |
| XLOC_002780 | LOC100644884              | NA_ | NN | OK | 2.50169 | 7.34231  | 1.55333   | 2.45791  | 1.00E-04 | 0.00631785 | yes |
| XLOC_002787 | LOC100647216              | NA_ | NN | OK | 418.102 | 1178.11  | 1.49455   | 3.94217  | 5.00E-05 | 0.00345316 | yes |
| XLOC_002825 | LOC100644718              | NA_ | NN | OK | 20.1546 | 12.0802  | -0.738459 | -2.00942 | 7.00E-04 | 0.0307351  | yes |
| XLOC_002874 | LOC100648673              | NA_ | NN | OK | 90.6501 | 174.373  | 0.943795  | 2.55935  | 5.00E-05 | 0.00345316 | yes |
| XLOC_002876 | LOC100645987              | NA_ | NN | OK | 107.737 | 31.7342  | -1.7634   | -4.57594 | 5.00E-05 | 0.00345316 | yes |
| XLOC_002880 | LOC100648940              | NA_ | NN | OK | 73.6804 | 43.9686  | -0.744808 | -2.18766 | 3.00E-04 | 0.015594   | yes |
| XLOC_002989 | LOC100648437              | NA_ | NN | OK | 23.9929 | 6.75564  | -1.82844  | -2.97841 | 5.00E-05 | 0.00345316 | yes |
| XLOC_002997 | LOC100645752              | NA_ | NN | OK | 19.9481 | 8.6986   | -1.1974   | -2.28446 | 2.00E-04 | 0.0111481  | yes |
| XLOC_003014 | LOC100651521              | NA_ | NN | OK | 228.255 | 356.848  | 0.644665  | 1.86171  | 0.0013   | 0.0504803  | no  |
| XLOC_003020 | LOC100643077              | NA_ | NN | OK | 18.7976 | 9.40286  | -0.999378 | -2.23796 | 1.00E-04 | 0.00631785 | yes |
| XLOC_003028 | Def                       | NA_ | NN | OK | 23740.8 | 63.7044  | -8.54176  | -11.516  | 5.00E-05 | 0.00345316 | yes |
| XLOC_003038 | LOC100644846              | NA_ | NN | OK | 9.04079 | 0.25965  | -5.12181  | -5.94539 | 5.00E-05 | 0.00345316 | yes |
| XLOC_003064 | LOC100643324              | NA_ | NN | OK | 8.33859 | 20.037   | 1.26479   | 3.17432  | 5.00E-05 | 0.00345316 | yes |
| XLOC_003097 | LOC100648747              | NA_ | NN | OK | 6.69938 | 3.83036  | -0.806548 | -1.79779 | 0.0015   | 0.0563532  | no  |
| XLOC_003143 | LOC100643448,LOC100643573 | NA_ | NN | OK | 109.373 | 197.287  | 0.851043  | 2.22072  | 5.00E-05 | 0.00345316 | yes |
| XLOC_003147 | LOC100651996              | NA_ | NN | OK | 272.976 | 442.76   | 0.697752  | 1.95232  | 8.00E-04 | 0.0340602  | yes |
| XLOC_003312 | LOC100649997              | NA_ | NN | OK | 74.2975 | 119.82   | 0.689486  | 2.02018  | 4.00E-04 | 0.0197472  | yes |
| XLOC_003350 | LOC100651567              | NA_ | NN | OK | 3.77557 | 0.644897 | -2.54955  | -3.3099  | 5.00E-05 | 0.00345316 | yes |
| XLOC_003351 | LOC100651683              | NA_ | NN | OK | 107.073 | 11.9385  | -3.1649   | -7.75307 | 5.00E-05 | 0.00345316 | yes |
| XLOC_003356 | LOC100642454              | NA_ | NN | OK | 182.727 | 285.028  | 0.641408  | 1.81206  | 0.0017   | 0.0626688  | no  |
| XLOC_003409 | LOC100652120              | NA_ | NN | OK | 9.37045 | 3.39471  | -1.46483  | -2.09479 | 0.00075  | 0.0324233  | yes |
| XLOC_003430 | LOC100642250              | NA_ | NN | OK | 184.36  | 113.921  | -0.694493 | -1.9234  | 0.0011   | 0.0442897  | yes |
| XLOC_003489 | LOC100645755              | NA_ | NN | OK | 6.51484 | 16.2332  | 1.31714   | 2.878    | 5.00E-05 | 0.00345316 | yes |
| XLOC_003557 | LOC100649576              | NA_ | NN | OK | 37.5184 | 23.8179  | -0.655553 | -1.90116 | 6.00E-04 | 0.0273847  | yes |
| XLOC_003608 | LOC100642844              | NA_ | NN | OK | 24.7664 | 9.69116  | -1.35364  | -3.65278 | 5.00E-05 | 0.00345316 | yes |
| XLOC_003637 | LOC100645125              | NA_ | NN | OK | 2.80575 | 9.32954  | 1.73342   | 3.19073  | 5.00E-05 | 0.00345316 | yes |
| XLOC_003643 | LOC100642209              | NA_ | NN | OK | 12.1132 | 1.06391  | -3.50912  | -4.60742 | 5.00E-05 | 0.00345316 | yes |
| XLOC_003665 | LOC100647066              | NA_ | NN | OK | 71.9281 | 119.212  | 0.728907  | 1.96677  | 0.00075  | 0.0324233  | yes |
| XLOC_003677 | LOC100650884              | NA_ | NN | OK | 23.8988 | 12.9489  | -0.884101 | -2.46115 | 5.00E-05 | 0.00345316 | yes |
| XLOC_003697 | LOC100644966              | NA_ | NN | OK | 2561.66 | 907.195  | -1.4976   | -3.46023 | 5.00E-05 | 0.00345316 | yes |
| XLOC_003698 | LOC100645083              | NA_ | NN | OK | 5.88069 | 1.80109  | -1.70711  | -2.71667 | 5.00E-05 | 0.00345316 | yes |
| XLOC_003735 | LOC100644134              | NA_ | NN | OK | 75.2079 | 122.927  | 0.708848  | 2.05848  | 0.00045  | 0.0216446  | yes |
| XLOC_003738 | LOC100649731              | NA_ | NN | OK | 52.9427 | 18.4256  | -1.52272  | -4.31828 | 5.00E-05 | 0.00345316 | yes |
| XLOC_003823 | LOC100644562,LOC100645524 | NA_ | NN | OK | 308.066 | 840.34   | 1.44773   | 3.00711  | 5.00E-05 | 0.00345316 | yes |
| XLOC_003827 | LOC100646382              | NA_ | NN | OK | 65.7415 | 35.1939  | -0.901481 | -2.07226 | 0.00045  | 0.0216446  | yes |
| XLOC_003829 | LOC100646624              | NA_ | NN | OK | 13.9544 | 33.2857  | 1.25418   | 3.20519  | 5.00E-05 | 0.00345316 | yes |
| XLOC_003830 | LOC100646863              | NA_ | NN | OK | 4.11131 | 0.776268 | -2.40497  | -2.58676 | 0.00015  | 0.00897192 | yes |
| XLOC_003860 | LOC100645991              | NA_ | NN | OK | 4.23789 | 2.12044  | -0.998981 | -1.8625  | 0.00165  | 0.0611699  | no  |
| XLOC_003889 | LOC100648399              | NA_ | NN | OK | 3.00624 | 0.624608 | -2.26694  | -3.53233 | 5.00E-05 | 0.00345316 | yes |
| XLOC_003919 | LOC100646625              | NA_ | NN | OK | 58.5795 | 38.142   | -0.619017 | -1.78666 | 0.002    | 0.0713194  | no  |
| XLOC_003922 | LOC100648166              | NA_ | NN | OK | 9.69794 | 19.3115  | 0.993706  | 2.28713  | 5.00E-05 | 0.00345316 | yes |
| XLOC_003933 | LOC100650726              | NA_ | NN | OK | 26.8008 | 9.02985  | -1.5695   | -3.51106 | 5.00E-05 | 0.00345316 | yes |
| XLOC_003952 | LOC100651882              | NA_ | NN | OK | 163.331 | 82.4559  | -0.9861   | -2.84064 | 5.00E-05 | 0.00345316 | yes |
| XLOC_003964 | LOC100648209              | NA_ | NN | OK | 2.94569 | 0.839328 | -1.8113   | -2.48852 | 0.00015  | 0.00897192 | yes |
| XLOC_004023 | LOC100644369              | NA_ | NN | OK | 26.6745 | 5.88545  | -2.18024  | -4.04282 | 5.00E-05 | 0.00345316 | yes |
| XLOC_004024 | LOC100649580              | NA_ | NN | OK | 43.9096 | 4.18523  | -3.39116  | -5.98455 | 5.00E-05 | 0.00345316 | yes |
| XLOC_004025 | LOC100644683              | NA_ | NN | OK | 2063.28 | 256.663  | -3.007    | -4.89164 | 5.00E-05 | 0.00345316 | yes |
| XLOC_004075 | NA                        | NA_ | NN | OK | 3.274   | 7.0158   | 1.09955   | 1.84875  | 0.00195  | 0.0699171  | no  |

|             |                           |     |    |    |          |          |           |          |          |            |     |
|-------------|---------------------------|-----|----|----|----------|----------|-----------|----------|----------|------------|-----|
| XLOC_004076 | NA                        | NA_ | NN | OK | 4.56515  | 11.5365  | 1.33748   | 2.26939  | 5.00E-04 | 0.0235311  | yes |
| XLOC_004108 | LOC100646028              | NA_ | NN | OK | 318.724  | 175.323  | -0.862297 | -1.99465 | 6.00E-04 | 0.0273847  | yes |
| XLOC_004165 | NA                        | NA_ | NN | OK | 10.2795  | 119.747  | 3.54215   | 6.76716  | 5.00E-05 | 0.00345316 | yes |
| XLOC_004205 | LOC100642761              | NA_ | NN | OK | 223.07   | 90.5062  | -1.30141  | -3.57144 | 5.00E-05 | 0.00345316 | yes |
| XLOC_004206 | LOC100648752              | NA_ | NN | OK | 773.969  | 403.421  | -0.939988 | -2.54214 | 5.00E-05 | 0.00345316 | yes |
| XLOC_004227 | LOC100647974              | NA_ | NN | OK | 118.814  | 19.4938  | -2.60762  | -7.03073 | 5.00E-05 | 0.00345316 | yes |
| XLOC_004358 | LOC100644893              | NA_ | NN | OK | 49.5373  | 93.6654  | 0.919002  | 2.61488  | 5.00E-05 | 0.00345316 | yes |
| XLOC_004445 | LOC100648790              | NA_ | NN | OK | 15.6828  | 31.2001  | 0.99237   | 2.52258  | 5.00E-05 | 0.00345316 | yes |
| XLOC_004512 | LOC100642574,LOC100647662 | NA_ | NN | OK | 466.416  | 252.419  | -0.8858   | -1.88684 | 0.0017   | 0.0626688  | no  |
| XLOC_004671 | LOC100646385              | NA_ | NN | OK | 29.8346  | 61.5301  | 1.0443    | 2.87997  | 5.00E-05 | 0.00345316 | yes |
| XLOC_004702 | LOC100648828              | NA_ | NN | OK | 39.0381  | 61.5665  | 0.657265  | 1.9338   | 0.001    | 0.0408069  | yes |
| XLOC_004716 | LOC100645995              | NA_ | NN | OK | 24.537   | 14.6427  | -0.744779 | -2.01057 | 3.00E-04 | 0.015594   | yes |
| XLOC_004724 | LOC100646348              | NA_ | NN | OK | 723.46   | 326.535  | -1.14768  | -2.47447 | 5.00E-05 | 0.00345316 | yes |
| XLOC_004736 | LOC100648521              | NA_ | NN | OK | 79.4721  | 39.1898  | -1.01997  | -2.84038 | 5.00E-05 | 0.00345316 | yes |
| XLOC_004784 | LOC100651647,LOC100652317 | NA_ | NN | OK | 39.0516  | 78.1488  | 1.00084   | 2.25186  | 5.00E-05 | 0.00345316 | yes |
| XLOC_004811 | LOC100645839,LOC100645951 | NA_ | NN | OK | 14.9432  | 7.6341   | -0.968958 | -1.88281 | 0.0015   | 0.0563532  | no  |
| XLOC_004812 | LOC100646065              | NA_ | NN | OK | 4.22371  | 0        | #NAME? NA |          | 5.00E-05 | 0.00345316 | yes |
| XLOC_004835 | LOC100643535              | NA_ | NN | OK | 17.6348  | 9.86948  | -0.837382 | -2.09324 | 3.00E-04 | 0.015594   | yes |
| XLOC_004865 | LOC100649218              | NA_ | NN | OK | 4.10083  | 1.18824  | -1.78709  | -2.54377 | 2.00E-04 | 0.0111481  | yes |
| XLOC_004950 | LOC100645916              | NA_ | NN | OK | 17.2594  | 7.80883  | -1.1442   | -2.19001 | 0.00025  | 0.0135134  | yes |
| XLOC_004999 | LOC100651889              | NA_ | NN | OK | 42.3475  | 17.151   | -1.30398  | -3.45594 | 5.00E-05 | 0.00345316 | yes |
| XLOC_005039 | LOC100652247              | NA_ | NN | OK | 33.1281  | 14.9358  | -1.14928  | -3.01327 | 5.00E-05 | 0.00345316 | yes |
| XLOC_005062 | LOC100646668              | NA_ | NN | OK | 4.42196  | 1.96841  | -1.16766  | -1.8377  | 0.002    | 0.0713194  | no  |
| XLOC_005075 | LOC100643580              | NA_ | NN | OK | 85.2796  | 50.1589  | -0.765695 | -2.22903 | 5.00E-05 | 0.00345316 | yes |
| XLOC_005118 | LOC100644530              | NA_ | NN | OK | 15.3126  | 9.79609  | -0.644443 | -1.826   | 0.00165  | 0.0611699  | no  |
| XLOC_005161 | LOC100651766              | NA_ | NN | OK | 8.68915  | 3.60793  | -1.26804  | -2.40904 | 2.00E-04 | 0.0111481  | yes |
| XLOC_005162 | LOC100649338              | NA_ | NN | OK | 1018.23  | 383.345  | -1.40935  | -2.69441 | 5.00E-05 | 0.00345316 | yes |
| XLOC_005240 | LOC100644450              | NA_ | NN | OK | 409.097  | 181.324  | -1.17388  | -3.1139  | 5.00E-05 | 0.00345316 | yes |
| XLOC_005282 | LOC100643900              | NA_ | NN | OK | 33.1376  | 13.9597  | -1.2472   | -2.46732 | 5.00E-05 | 0.00345316 | yes |
| XLOC_005325 | LOC100643169              | NA_ | NN | OK | 25.824   | 14.924   | -0.791074 | -2.15488 | 5.00E-05 | 0.00345316 | yes |
| XLOC_005395 | LOC100643086              | NA_ | NN | OK | 80.5671  | 159.194  | 0.982523  | 2.87582  | 5.00E-05 | 0.00345316 | yes |
| XLOC_005406 | LOC100650166              | NA_ | NN | OK | 25.5178  | 47.1484  | 0.885703  | 2.37711  | 5.00E-05 | 0.00345316 | yes |
| XLOC_005408 | LOC100650692              | NA_ | NN | OK | 79.5176  | 47.2954  | -0.749576 | -2.08865 | 0.00025  | 0.0135134  | yes |
| XLOC_005426 | LOC100645456              | NA_ | NN | OK | 29.7817  | 15.4662  | -0.945303 | -2.56959 | 5.00E-05 | 0.00345316 | yes |
| XLOC_005512 | LOC100645956              | NA_ | NN | OK | 207.209  | 340.898  | 0.718255  | 1.96393  | 0.00065  | 0.0289604  | yes |
| XLOC_005517 | LOC100649221,LOC100649341 | NA_ | NN | OK | 90.7289  | 56.8247  | -0.675043 | -1.88379 | 0.00135  | 0.0517066  | no  |
| XLOC_005553 | NA                        | NA_ | NN | OK | 552.618  | 314.798  | -0.811855 | -2.13672 | 4.00E-04 | 0.0197472  | yes |
| XLOC_005555 | LOC100648717              | NA_ | NN | OK | 579.006  | 280.993  | -1.04304  | -2.83613 | 5.00E-05 | 0.00345316 | yes |
| XLOC_005610 | LOC100644732              | NA_ | NN | OK | 20.5159  | 57.4111  | 1.48459   | 3.63852  | 5.00E-05 | 0.00345316 | yes |
| XLOC_005663 | LOC100649304              | NA_ | NN | OK | 8.97173  | 27.057   | 1.59254   | 4.0817   | 5.00E-05 | 0.00345316 | yes |
| XLOC_005683 | LOC100642892              | NA_ | NN | OK | 40.1345  | 62.1084  | 0.629946  | 1.83723  | 0.00135  | 0.0517066  | no  |
| XLOC_005691 | LOC100647906              | NA_ | NN | OK | 20.0605  | 10.2507  | -0.968642 | -2.67048 | 5.00E-05 | 0.00345316 | yes |
| XLOC_005736 | LOC100642500              | NA_ | NN | OK | 33.759   | 17.1916  | -0.973571 | -2.19635 | 3.00E-04 | 0.015594   | yes |
| XLOC_005738 | LOC100649306              | NA_ | NN | OK | 15.3683  | 6.4378   | -1.25532  | -2.3323  | 1.00E-04 | 0.00631785 | yes |
| XLOC_005745 | LOC100649106              | NA_ | NN | OK | 47.554   | 21.0719  | -1.17425  | -3.15023 | 5.00E-05 | 0.00345316 | yes |
| XLOC_005750 | LOC100647229              | NA_ | NN | OK | 8.52791  | 17.1704  | 1.00966   | 2.2141   | 0.00025  | 0.0135134  | yes |
| XLOC_005821 | LOC100647110              | NA_ | NN | OK | 7.78759  | 3.30177  | -1.23794  | -2.46979 | 1.00E-04 | 0.00631785 | yes |
| XLOC_005873 | LOC100648645              | NA_ | NN | OK | 85.9255  | 35.1515  | -1.2895   | -3.64312 | 5.00E-05 | 0.00345316 | yes |
| XLOC_005968 | LOC100651170              | NA_ | NN | OK | 209.424  | 329.678  | 0.654633  | 1.83897  | 0.00175  | 0.0640314  | no  |
| XLOC_006112 | LOC100651094              | NA_ | NN | OK | 6289.04  | 1134.05  | -2.47135  | -3.43798 | 5.00E-05 | 0.00345316 | yes |
| XLOC_006148 | LOC100651578              | NA_ | NN | OK | 22.2772  | 6.97005  | -1.67632  | -2.62963 | 5.00E-05 | 0.00345316 | yes |
| XLOC_006206 | LOC100645340              | NA_ | NN | OK | 4.85039  | 0.293673 | -4.04582  | -3.75135 | 7.00E-04 | 0.0307351  | yes |
| XLOC_006244 | LOC100645920              | NA_ | NN | OK | 20.1323  | 9.05247  | -1.15313  | -2.09222 | 0.0012   | 0.0473458  | yes |
| XLOC_006258 | LOC100645022,LOC100645214 | NA_ | NN | OK | 172.729  | 287.107  | 0.733076  | 2.04548  | 0.00055  | 0.0255477  | yes |
| XLOC_006264 | LOC100643779              | NA_ | NN | OK | 92.5196  | 174.237  | 0.913218  | 2.32846  | 5.00E-05 | 0.00345316 | yes |
| XLOC_006297 | LOC100646239              | NA_ | NN | OK | 54.5066  | 32.6907  | -0.737549 | -2.01996 | 0.00035  | 0.0178855  | yes |
| XLOC_006305 | LOC100644101              | NA_ | NN | OK | 0.897822 | 9.41978  | 3.39119   | 3.26921  | 3.00E-04 | 0.015594   | yes |
| XLOC_006314 | LOC100642295              | NA_ | NN | OK | 36.2327  | 10.1645  | -1.83376  | -4.49087 | 5.00E-05 | 0.00345316 | yes |
| XLOC_006344 | LOC100644692              | NA_ | NN | OK | 69.7119  | 43.5481  | -0.678793 | -1.94689 | 0.00085  | 0.0357628  | yes |
| XLOC_006345 | NA                        | NA_ | NN | OK | 69.0754  | 141.86   | 1.03823   | 2.62606  | 5.00E-05 | 0.00345316 | yes |
| XLOC_006437 | LOC100645806              | NA_ | NN | OK | 18.8276  | 6.94093  | -1.43965  | -3.02896 | 5.00E-05 | 0.00345316 | yes |
| XLOC_006470 | LOC100643254              | NA_ | NN | OK | 52.9337  | 92.8813  | 0.811203  | 2.01571  | 0.00045  | 0.0216446  | yes |
| XLOC_006471 | LOC100643622              | NA_ | NN | OK | 20.2966  | 48.4103  | 1.25407   | 3.4436   | 5.00E-05 | 0.00345316 | yes |
| XLOC_006482 | LOC100645885              | NA_ | NN | OK | 96.1614  | 233.065  | 1.2772    | 3.73725  | 5.00E-05 | 0.00345316 | yes |
| XLOC_006490 | LOC100646873              | NA_ | NN | OK | 92.7041  | 175.673  | 0.922186  | 2.57483  | 5.00E-05 | 0.00345316 | yes |
| XLOC_006509 | LOC100650336,LOC100650454 | NA_ | NN | OK | 84.6302  | 145.295  | 0.77974   | 2.09041  | 2.00E-04 | 0.0111481  | yes |
| XLOC_006579 | LOC100645650              | NA_ | NN | OK | 62.4048  | 146.608  | 1.23224   | 3.57753  | 5.00E-05 | 0.00345316 | yes |
| XLOC_006664 | LOC100648294              | NA_ | NN | OK | 75.5935  | 36.1049  | -1.06607  | -2.9793  | 5.00E-05 | 0.00345316 | yes |
| XLOC_006677 | LOC100647588              | NA_ | NN | OK | 45.7398  | 91.9328  | 1.00713   | 2.81842  | 5.00E-05 | 0.00345316 | yes |
| XLOC_006685 | LOC100644817              | NA_ | NN | OK | 64.632   | 147.383  | 1.18925   | 2.74842  | 5.00E-05 | 0.00345316 | yes |
| XLOC_006698 | LOC100644616              | NA_ | NN | OK | 20.9739  | 11.2349  | -0.900615 | -2.38626 | 5.00E-05 | 0.00345316 | yes |
| XLOC_006735 | LOC100644939              | NA_ | NN | OK | 28.9924  | 14.054   | -1.04469  | -2.54909 | 5.00E-05 | 0.00345316 | yes |
| XLOC_006757 | LOC100645023              | NA_ | NN | OK | 2.36033  | 0.670804 | -1.81502  | -2.34976 | 2.00E-04 | 0.0111481  | yes |
| XLOC_006761 | LOC100644375              | NA_ | NN | OK | 53.1939  | 85.3061  | 0.681387  | 1.84087  | 0.0015   | 0.0563532  | no  |
| XLOC_006765 | LOC100643258              | NA_ | NN | OK | 1.97124  | 0.505691 | -1.96277  | -2.70051 | 5.00E-05 | 0.00345316 | yes |
| XLOC_006839 | LOC100648029              | NA_ | NN | OK | 102.058  | 203.89   | 0.998401  | 2.82957  | 5.00E-05 | 0.00345316 | yes |

|             |                           |     |    |    |         |          |           |          |          |            |     |
|-------------|---------------------------|-----|----|----|---------|----------|-----------|----------|----------|------------|-----|
| XLOC_006881 | LOC100651655              | NA_ | NN | OK | 310.817 | 97.3056  | -1.67547  | -4.54904 | 5.00E-05 | 0.00345316 | yes |
| XLOC_006886 | LOC100643588              | NA_ | NN | OK | 288.148 | 90.8557  | -1.66516  | -4.56027 | 5.00E-05 | 0.00345316 | yes |
| XLOC_006894 | LOC100645536              | NA_ | NN | OK | 6.11819 | 3.15335  | -0.956218 | -1.83278 | 0.00175  | 0.0640314  | no  |
| XLOC_006914 | NA                        | NA_ | NN | OK | 24.7942 | 6.96101  | -1.83263  | -4.54472 | 5.00E-05 | 0.00345316 | yes |
| XLOC_006924 | LOC100648224              | NA_ | NN | OK | 126.276 | 24.4024  | -2.37148  | -6.18365 | 5.00E-05 | 0.00345316 | yes |
| XLOC_006949 | LOC100652292              | NA_ | NN | OK | 38.4147 | 74.4546  | 0.954703  | 2.74995  | 5.00E-05 | 0.00345316 | yes |
| XLOC_006963 | LOC100651851              | NA_ | NN | OK | 122.71  | 424.172  | 1.78939   | 2.27731  | 0.00065  | 0.0289604  | yes |
| XLOC_006964 | LOC100651730              | NA_ | NN | OK | 11.9659 | 67.8554  | 2.50353   | 3.82712  | 5.00E-05 | 0.00345316 | yes |
| XLOC_006986 | LOC100642897              | NA_ | NN | OK | 2.69057 | 1.17333  | -1.1973   | -1.82943 | 0.00195  | 0.0699171  | no  |
| XLOC_007010 | LOC100644779              | NA_ | NN | OK | 17.6348 | 9.59438  | -0.878159 | -2.33551 | 5.00E-05 | 0.00345316 | yes |
| XLOC_007055 | LOC100651261              | NA_ | NN | OK | 44.5178 | 27.9482  | -0.671625 | -1.88759 | 0.00135  | 0.0517066  | no  |
| XLOC_007058 | LOC100651731              | NA_ | NN | OK | 164.883 | 97.471   | -0.758398 | -2.04616 | 0.00045  | 0.0216446  | yes |
| XLOC_007076 | LOC100647116              | NA_ | NN | OK | 55.3698 | 32.7235  | -0.758775 | -2.02282 | 0.00075  | 0.0324233  | yes |
| XLOC_007126 | LOC100648607              | NA_ | NN | OK | 21.099  | 2.13765  | -3.30308  | -5.81395 | 5.00E-05 | 0.00345316 | yes |
| XLOC_007127 | LOC100648799              | NA_ | NN | OK | 31.7085 | 17.8261  | -0.830876 | -2.08385 | 4.00E-04 | 0.0197472  | yes |
| XLOC_007128 | LOC100649711              | NA_ | NN | OK | 16.9713 | 2.54582  | -2.7369   | -3.7825  | 5.00E-05 | 0.00345316 | yes |
| XLOC_007136 | LOC100647787              | NA_ | NN | OK | 12.0804 | 6.93801  | -0.800075 | -1.89524 | 0.00105  | 0.0425819  | yes |
| XLOC_007236 | LOC100650219              | NA_ | NN | OK | 104.541 | 172.964  | 0.726409  | 1.86462  | 0.00135  | 0.0517066  | no  |
| XLOC_007238 | LOC100642940              | NA_ | NN | OK | 6.72282 | 16.7976  | 1.32112   | 1.88548  | 0.00155  | 0.0580099  | no  |
| XLOC_007296 | LOC100646517              | NA_ | NN | OK | 23.0162 | 41.7751  | 0.859995  | 1.92078  | 9.00E-04 | 0.0374257  | yes |
| XLOC_007329 | LOC100648144,LOC100648258 | NA_ | NN | OK | 68.9356 | 31.4319  | -1.13302  | -2.37054 | 0.00085  | 0.0357628  | yes |
| XLOC_007354 | LOC100646359              | NA_ | NN | OK | 16.8405 | 33.4242  | 0.988956  | 2.80634  | 5.00E-05 | 0.00345316 | yes |
| XLOC_007386 | LOC100643057              | NA_ | NN | OK | 3.67193 | 1.21476  | -1.59587  | -1.85797 | 0.0017   | 0.0626688  | no  |
| XLOC_007389 | LOC100644497              | NA_ | NN | OK | 2.02707 | 0        | #NAME? NA |          | 5.00E-05 | 0.00345316 | yes |
| XLOC_007393 | LOC100644978              | NA_ | NN | OK | 22.2605 | 1.28916  | -4.10998  | -5.47261 | 5.00E-05 | 0.00345316 | yes |
| XLOC_007500 | LOC100642226              | NA_ | NN | OK | 286.5   | 33.5367  | -3.09472  | -8.49535 | 5.00E-05 | 0.00345316 | yes |
| XLOC_007508 | LOC100650012              | NA_ | NN | OK | 16.7433 | 30.9817  | 0.887835  | 2.17451  | 3.00E-04 | 0.015594   | yes |
| XLOC_007640 | LOC100650221              | NA_ | NN | OK | 143.399 | 63.493   | -1.17537  | -3.26147 | 5.00E-05 | 0.00345316 | yes |
| XLOC_007644 | LOC100650789              | NA_ | NN | OK | 302.193 | 191.415  | -0.658766 | -1.93032 | 0.00075  | 0.0324233  | yes |
| XLOC_007647 | LOC100646603              | NA_ | NN | OK | 190.036 | 313.343  | 0.72147   | 2.00827  | 0.00045  | 0.0216446  | yes |
| XLOC_007673 | LOC100643060              | NA_ | NN | OK | 11.9023 | 7.01983  | -0.76173  | -1.91489 | 0.00115  | 0.0457868  | yes |
| XLOC_007701 | LOC100645349              | NA_ | NN | OK | 56.0173 | 260.389  | 2.21673   | 6.01595  | 5.00E-05 | 0.00345316 | yes |
| XLOC_007727 | LOC100650132              | NA_ | NN | OK | 20.4252 | 38.3453  | 0.908695  | 2.61633  | 5.00E-05 | 0.00345316 | yes |
| XLOC_007755 | LOC100643345              | NA_ | NN | OK | 15.627  | 8.8084   | -0.827085 | -2.12154 | 4.00E-04 | 0.0197472  | yes |
| XLOC_007770 | LOC100649429              | NA_ | NN | OK | 8.09588 | 14.9235  | 0.882327  | 2.21529  | 5.00E-05 | 0.00345316 | yes |
| XLOC_007807 | NA                        | NA_ | NN | OK | 4.45356 | 1.46901  | -1.60012  | -2.07405 | 0.001    | 0.0408069  | yes |
| XLOC_007848 | LOC100647555              | NA_ | NN | OK | 24.0044 | 64.8729  | 1.43432   | 2.78926  | 5.00E-05 | 0.00345316 | yes |
| XLOC_007862 | LOC100643830              | NA_ | NN | OK | 12.6479 | 5.03933  | -1.32759  | -3.41526 | 5.00E-05 | 0.00345316 | yes |
| XLOC_007877 | LOC100648148              | NA_ | NN | OK | 5.27523 | 22.361   | 2.08368   | 2.75407  | 1.00E-04 | 0.00631785 | yes |
| XLOC_007919 | LOC100645892              | NA_ | NN | OK | 288.863 | 442.659  | 0.615809  | 1.74453  | 0.00205  | 0.072445   | no  |
| XLOC_007943 | LOC100650460              | NA_ | NN | OK | 5214.24 | 759.907  | -2.77856  | -3.477   | 5.00E-05 | 0.00345316 | yes |
| XLOC_008038 | LOC100644380              | NA_ | NN | OK | 88.5163 | 41.4661  | -1.09401  | -3.147   | 5.00E-05 | 0.00345316 | yes |
| XLOC_008056 | LOC100651143              | NA_ | NN | OK | 188.826 | 296.179  | 0.649411  | 1.90799  | 7.00E-04 | 0.0307351  | yes |
| XLOC_008082 | LOC100644824              | NA_ | NN | OK | 15.0824 | 9.01961  | -0.741729 | -1.9867  | 8.00E-04 | 0.0340602  | yes |
| XLOC_008131 | LOC100645424              | NA_ | NN | OK | 60.8983 | 7.39256  | -3.04226  | -4.64655 | 5.00E-05 | 0.00345316 | yes |
| XLOC_008163 | LOC100647082              | NA_ | NN | OK | 530.949 | 135.265  | -1.97278  | -5.53218 | 5.00E-05 | 0.00345316 | yes |
| XLOC_008190 | LOC100642903              | NA_ | NN | OK | 326.083 | 576.411  | 0.821857  | 2.25885  | 5.00E-05 | 0.00345316 | yes |
| XLOC_008240 | LOC100644946              | NA_ | NN | OK | 22.7078 | 13.2575  | -0.776374 | -2.17767 | 0.00015  | 0.00897192 | yes |
| XLOC_008241 | LOC100644582              | NA_ | NN | OK | 4.80511 | 0.457982 | -3.39121  | -4.01668 | 5.00E-05 | 0.00345316 | yes |
| XLOC_008242 | LOC100648536              | NA_ | NN | OK | 613.032 | 1.25599  | -8.93099  | -9.71852 | 5.00E-05 | 0.00345316 | yes |
| XLOC_008264 | LOC100648036              | NA_ | NN | OK | 3.28911 | 14.098   | 2.09972   | 3.75063  | 5.00E-05 | 0.00345316 | yes |
| XLOC_008294 | LOC100644984              | NA_ | NN | OK | 3.32915 | 0.963444 | -1.78888  | -2.11234 | 0.00135  | 0.0517066  | no  |
| XLOC_008307 | LOC100649276              | NA_ | NN | OK | 40.4575 | 64.5549  | 0.67412   | 1.87654  | 0.0013   | 0.0504803  | no  |
| XLOC_008310 | LOC100649601              | NA_ | NN | OK | 13.0199 | 33.8551  | 1.37865   | 3.40365  | 5.00E-05 | 0.00345316 | yes |
| XLOC_008312 | LOC100650863              | NA_ | NN | OK | 1.22997 | 3.2629   | 1.40754   | 1.94908  | 0.0018   | 0.0656165  | no  |
| XLOC_008314 | LOC100650745              | NA_ | NN | OK | 2.97545 | 177.167  | 5.89586   | 10.4448  | 5.00E-05 | 0.00345316 | yes |
| XLOC_008375 | LOC100651465              | NA_ | NN | OK | 30.7961 | 51.331   | 0.737085  | 2.0867   | 2.00E-04 | 0.0111481  | yes |
| XLOC_008454 | LOC100649787              | NA_ | NN | OK | 46.9792 | 109.661  | 1.22295   | 3.2269   | 5.00E-05 | 0.00345316 | yes |
| XLOC_008636 | LOC100644828              | NA_ | NN | OK | 39.1379 | 76.285   | 0.962833  | 2.72693  | 5.00E-05 | 0.00345316 | yes |
| XLOC_008640 | LOC100650704              | NA_ | NN | OK | 69.4458 | 173.71   | 1.32272   | 3.61849  | 5.00E-05 | 0.00345316 | yes |
| XLOC_008664 | LOC100643262              | NA_ | NN | OK | 95.259  | 15.499   | -2.61968  | -3.77124 | 5.00E-05 | 0.00345316 | yes |
| XLOC_008676 | LOC100648346              | NA_ | NN | OK | 69.1943 | 142.223  | 1.03943   | 2.67111  | 5.00E-05 | 0.00345316 | yes |
| XLOC_008695 | LOC100650705              | NA_ | NN | OK | 25.6443 | 13.5075  | -0.924875 | -1.79513 | 0.00205  | 0.072445   | no  |
| XLOC_008761 | LOC100643788              | NA_ | NN | OK | 114.29  | 37.7342  | -1.59875  | -4.33421 | 5.00E-05 | 0.00345316 | yes |
| XLOC_008780 | LOC100649157              | NA_ | NN | OK | 23.1598 | 47.4762  | 1.03558   | 2.79831  | 5.00E-05 | 0.00345316 | yes |
| XLOC_008828 | LOC100642546              | NA_ | NN | OK | 4.70581 | 1.2598   | -1.90125  | -2.13621 | 5.00E-04 | 0.0235311  | yes |
| XLOC_008897 | NA                        | NA_ | NN | OK | 7.86494 | 3.40003  | -1.20989  | -2.09411 | 5.00E-04 | 0.0235311  | yes |
| XLOC_008909 | LOC100643142              | NA_ | NN | OK | 15.4275 | 32.3032  | 1.06617   | 2.45372  | 5.00E-05 | 0.00345316 | yes |
| XLOC_008954 | LOC100649239              | NA_ | NN | OK | 15.1636 | 5.91487  | -1.35819  | -2.29484 | 2.00E-04 | 0.0111481  | yes |
| XLOC_008988 | LOC100646640              | NA_ | NN | OK | 11.757  | 4.679    | -1.32925  | -2.02221 | 0.00075  | 0.0324233  | yes |
| XLOC_009013 | LOC100644867              | NA_ | NN | OK | 140.704 | 291.392  | 1.0503    | 2.86319  | 5.00E-05 | 0.00345316 | yes |
| XLOC_009060 | LOC100643869              | NA_ | NN | OK | 89.4505 | 162.104  | 0.857756  | 2.38303  | 5.00E-05 | 0.00345316 | yes |
| XLOC_009065 | LOC100644539              | NA_ | NN | OK | 5.87723 | 0.586406 | -3.32516  | -2.86531 | 0.00085  | 0.0357628  | yes |
| XLOC_009130 | LOC100652301              | NA_ | NN | OK | 1879.69 | 931.451  | -1.01294  | -2.36338 | 5.00E-05 | 0.00345316 | yes |
| XLOC_009190 | LOC100647796              | NA_ | NN | OK | 953.05  | 2367.89  | 1.31298   | 2.61208  | 5.00E-05 | 0.00345316 | yes |
| XLOC_009245 | LOC100646642              | NA_ | NN | OK | 23.8783 | 54.9457  | 1.2023    | 2.57012  | 5.00E-05 | 0.00345316 | yes |

|             |              |     |    |    |         |          |           |          |          |            |     |
|-------------|--------------|-----|----|----|---------|----------|-----------|----------|----------|------------|-----|
| XLOC_009253 | LOC100648002 | NA_ | NN | OK | 36.428  | 125.233  | 1.7815    | 4.72219  | 5.00E-05 | 0.00345316 | yes |
| XLOC_009304 | LOC100642713 | NA_ | NN | OK | 65.6354 | 118.129  | 0.847816  | 2.2692   | 1.00E-04 | 0.00631785 | yes |
| XLOC_009340 | LOC100649907 | NA_ | NN | OK | 393.443 | 888.616  | 1.17541   | 3.08057  | 5.00E-05 | 0.00345316 | yes |
| XLOC_009350 | LOC100651509 | NA_ | NN | OK | 58.5838 | 30.7163  | -0.931497 | -2.27667 | 5.00E-05 | 0.00345316 | yes |
| XLOC_009357 | LOC100652332 | NA_ | NN | OK | 3.51427 | 0.792022 | -2.14961  | -2.14484 | 0.00185  | 0.0671899  | no  |
| XLOC_009385 | LOC100651905 | NA_ | NN | OK | 14.7823 | 30.6706  | 1.05299   | 2.79148  | 5.00E-05 | 0.00345316 | yes |
| XLOC_009465 | LOC100645228 | NA_ | NN | OK | 12.3154 | 7.13858  | -0.78675  | -2.23119 | 5.00E-05 | 0.00345316 | yes |
| XLOC_009466 | LOC100645662 | NA_ | NN | OK | 433.882 | 237.172  | -0.871368 | -2.32686 | 5.00E-05 | 0.00345316 | yes |
| XLOC_009468 | LOC100645782 | NA_ | NN | OK | 74.3685 | 37.1771  | -1.00028  | -2.78882 | 5.00E-05 | 0.00345316 | yes |
| XLOC_009485 | NA           | NA_ | NN | OK | 24.3548 | 8.70058  | -1.48502  | -2.01239 | 0.00125  | 0.0489743  | yes |
| XLOC_009495 | LOC100647883 | NA_ | NN | OK | 63.5773 | 112.403  | 0.822096  | 2.24626  | 5.00E-05 | 0.00345316 | yes |
| XLOC_009505 | LOC100642272 | NA_ | NN | OK | 781.236 | 1439.51  | 0.881746  | 2.07719  | 0.00055  | 0.0255477  | yes |
| XLOC_009566 | LOC100649867 | NA_ | NN | OK | 12341   | 390.313  | -4.98268  | -9.87853 | 5.00E-05 | 0.00345316 | yes |
| XLOC_009568 | LOC100649983 | NA_ | NN | OK | 26.8607 | 10.5002  | -1.35508  | -3.04472 | 5.00E-05 | 0.00345316 | yes |
| XLOC_009579 | LOC100651307 | NA_ | NN | OK | 361.785 | 866.083  | 1.25937   | 3.32495  | 5.00E-05 | 0.00345316 | yes |
| XLOC_009604 | LOC100644470 | NA_ | NN | OK | 65.1029 | 457.027  | 2.81148   | 5.10547  | 5.00E-05 | 0.00345316 | yes |
| XLOC_009617 | LOC100642789 | NA_ | NN | OK | 52.0531 | 26.2362  | -0.988427 | -2.14062 | 2.00E-04 | 0.0111481  | yes |
| XLOC_009834 | NA           | NA_ | NN | OK | 109.717 | 182.255  | 0.732168  | 2.12216  | 0.00025  | 0.0135134  | yes |
| XLOC_009843 | LOC100645510 | NA_ | NN | OK | 8.217   | 0.883309 | -3.21762  | -3.44769 | 1.00E-04 | 0.00631785 | yes |
| XLOC_009860 | LOC100646646 | NA_ | NN | OK | 54.8109 | 28.9349  | -0.921652 | -2.38796 | 5.00E-05 | 0.00345316 | yes |
| XLOC_009862 | LOC100648041 | NA_ | NN | OK | 18.6115 | 9.85122  | -0.91782  | -2.08597 | 0.00025  | 0.0135134  | yes |
| XLOC_009885 | LOC100650989 | NA_ | NN | OK | 7.8314  | 2.686    | -1.54381  | -2.4883  | 1.00E-04 | 0.00631785 | yes |
| XLOC_009940 | NA           | NA_ | NN | OK | 5958.82 | 206.382  | -4.85164  | -10.9525 | 5.00E-05 | 0.00345316 | yes |
| XLOC_009958 | NA           | NA_ | NN | OK | 73014.9 | 37.7272  | -10.9184  | -15.3104 | 5.00E-05 | 0.00345316 | yes |
