# Supplementary material for: Royal Decree: Gene Expression in Trans-Generationally Immune Primed Bumblebee Workers Mimics a Primary Immune Response
Source: PubMed Central journal article supplement (PMC4956190; doi:10.1371/journal.pone.0159635), 2016-07-21
Supplement: pone.0159635.s009.pdf [file pone.0159635.s009.pdf]

| xloc        | gene         | sample_1 | sample_2 | status | FPKM_1  | FPKM_2  | log2_fold_change | test_stat | p_value  | q_value    | significant |
|-------------|--------------|----------|----------|--------|---------|---------|------------------|-----------|----------|------------|-------------|
| XLOC_000619 | LOC100645702 | AN       | NN       | OK     | 36.6008 | 18.5336 | -0.981733        | -2.47206  | 5.00E-05 | 0.00345316 | yes         |
| XLOC_001088 | LOC100646374 | AN       | NN       | OK     | 38.6835 | 18.706  | -1.04822         | -2.95426  | 5.00E-05 | 0.00345316 | yes         |
| XLOC_001402 | PEPCK        | AN       | NN       | OK     | 29.5708 | 80.089  | 1.43743          | 3.74494   | 5.00E-05 | 0.00345316 | yes         |
| XLOC_001475 | LOC100631078 | AN       | NN       | OK     | 2383.16 | 176.515 | -3.75501         | -5.38066  | 5.00E-05 | 0.00345316 | yes         |
| XLOC_001602 | LOC100644713 | AN       | NN       | OK     | 332.765 | 140.852 | -1.24032         | -3.40058  | 5.00E-05 | 0.00345316 | yes         |
| XLOC_002038 | LOC100642443 | AN       | NN       | OK     | 1761.24 | 192.525 | -3.19348         | -4.58661  | 5.00E-05 | 0.00345316 | yes         |
| XLOC_002178 | LOC100642484 | AN       | NN       | OK     | 20.8605 | 72.5504 | 1.79821          | 3.63521   | 5.00E-05 | 0.00345316 | yes         |
| XLOC_002183 | LOC100651916 | AN       | NN       | OK     | 594.206 | 232.48  | -1.35385         | -2.79615  | 5.00E-05 | 0.00345316 | yes         |
| XLOC_002219 | LOC100643115 | AN       | NN       | OK     | 390.75  | 708.973 | 0.859484         | 2.21551   | 1.00E-04 | 0.00631785 | yes         |
| XLOC_003028 | Def          | AN       | NN       | OK     | 2724.13 | 63.7044 | -5.41826         | -7.22478  | 5.00E-05 | 0.00345316 | yes         |
| XLOC_003351 | LOC100651683 | AN       | NN       | OK     | 24.6678 | 11.9385 | -1.04701         | -2.55888  | 5.00E-05 | 0.00345316 | yes         |
| XLOC_003637 | LOC100645125 | AN       | NN       | OK     | 4.01029 | 9.32954 | 1.2181           | 2.34286   | 1.00E-04 | 0.00631785 | yes         |
| XLOC_004999 | LOC100651889 | AN       | NN       | OK     | 36.9364 | 17.151  | -1.10675         | -2.85579  | 5.00E-05 | 0.00345316 | yes         |
| XLOC_005282 | LOC100643900 | AN       | NN       | OK     | 31.4235 | 13.9597 | -1.17057         | -2.72443  | 5.00E-05 | 0.00345316 | yes         |
| XLOC_006478 | LOC100644816 | AN       | NN       | OK     | 75.5648 | 20.4398 | -1.88633         | -2.92659  | 5.00E-05 | 0.00345316 | yes         |
| XLOC_006924 | LOC100648224 | AN       | NN       | OK     | 87.2479 | 24.4024 | -1.8381          | -4.46132  | 5.00E-05 | 0.00345316 | yes         |
| XLOC_008131 | LOC100645424 | AN       | NN       | OK     | 27.9538 | 7.39256 | -1.9189          | -3.07779  | 5.00E-05 | 0.00345316 | yes         |
| XLOC_008828 | LOC100642546 | AN       | NN       | OK     | 5.6473  | 1.2598  | -2.16437         | -2.63025  | 5.00E-05 | 0.00345316 | yes         |
| XLOC_009566 | LOC100649867 | AN       | NN       | OK     | 1284.4  | 390.313 | -1.71839         | -3.5509   | 5.00E-05 | 0.00345316 | yes         |
| XLOC_009940 | NA           | AN       | NN       | OK     | 702.397 | 206.382 | -1.76697         | -3.80947  | 5.00E-05 | 0.00345316 | yes         |
| XLOC_009958 | NA           | AN       | NN       | OK     | 4719.13 | 37.7272 | -6.96677         | -9.31693  | 5.00E-05 | 0.00345316 | yes         |
