# Supplementary material for: Royal Decree: Gene Expression in Trans-Generationally Immune Primed Bumblebee Workers Mimics a Primary Immune Response
Source: PubMed Central journal article supplement (PMC4956190; doi:10.1371/journal.pone.0159635), 2016-07-21
Supplement: pone.0159635.s010.pdf [file pone.0159635.s010.pdf]

| Gene ID      | NCBI Accession | Name                                              | F primer                 | R primer                  | Note                                      |
|--------------|----------------|---------------------------------------------------|--------------------------|---------------------------|-------------------------------------------|
| LOC100645702 | XM_003393468   | Kynurenine/alpha-aminoadipate aminotransferase    | ATCCTAGCAAACCATGCAACGC   | CCATTGCCAAGTTCAATTTCTTCGC |                                           |
| LOC100646374 | XM_003393788   | Battenin                                          | TTCTTGGTGGTGGAGCATACGTG  | TACGATCCGCCCTTGAATCTC     |                                           |
| PEPCK        | XM_003394476   | Phosphoenolpyruvate carboxykinase                 | ATGGCGCTACCAACCCTAATGC   | TGCCTCGCAATCGGTGATTTTC    |                                           |
| LOC100644713 | XM_003394095   | Laccase-2                                         | TCCAGGGTGGTGGTACTTCATTG  | CGTGTATGACCAGTCCATTCCAG   |                                           |
| LOC100642484 | XM_003395038   | Venom Protease                                    | ACGTTTCTCAGGAGTGATGAGGAC | TCAACTGATGGATGCAGGAGGAC   |                                           |
| LOC100643115 | XM_003394962   | Hypothetical protein LOC100643115                 | GAAGTGCAAGCGTACGGAAAC    | AACCGCTTCCTGCCACTTATG     |                                           |
| LOC100651889 | XM_003398271   | Hypothetical protein LOC100651889                 | ATACTTGTGGCCGAGCGTTGC    | GAGTTGCGTCTTCCCTTGTCTTG   |                                           |
| LOC100643900 | XM_003398287   | 15-hydroxyprostaglandin dehydrogenase [NAD+]-like | GTGTGCCCTGGACGTACAATAAC  | TTTCGCCACACACTCTGGTG      |                                           |
| LOC100644816 | XM_003399422   | Mast cell degranulating peptide (MCDP)            | ACCCGATTTGTATAAGAGTCTGT  | TCCTAGAGCTTGTGGAATTTAGT   |                                           |
| LOC100648224 | XM_003400005   | Uncharacterized LOC100648224                      | GGAGGAATTCGCTGAGCAGTTG   | TCGGTTGCTCTGTGTCTTAGG     |                                           |
| LOC100648499 | XR_132448      | Apidaecin                                         | CGTGTGTGTGCAGTCGGTAATTC  | GTCTGCGTAAAGTTCAAGGCTTC   |                                           |
| LOC100642442 | XM_003394713   | BGRP2                                             | TAACCTCCCTTTGGAAACACG    | GGCGTAAATACTGAACGA        |                                           |
| LOC100647662 | XM_003397996   | BGRP1                                             | AACGTGGAAGTCAAAGATGG     | GCGAACGATGACTTGGTATT      |                                           |
| LOC100649867 | XM_003402966   | Apidaecin                                         | CCCGACTAATGTACCTGCCA     | GAAGGTGCGAATGTGTGGA       |                                           |
| Def          | XM_003395924   | Defensin                                          | GTCTGCCTTTGTCGCAAGAC     | GACATTAGTCGCGTCTTCTCG     | LOC100631063                              |
| LOC100631061 | XR_132450      | Hymenoptaecin                                     | TTCATCGTACTGGCTCTCTTCTG  | AGCCGTAGTATTCTCCACAGC     |                                           |
| LOC100631078 | XM_003394653   | Abaecin                                           | GCCACAATATGTGGAATCCT     | ATGACCAGGTTTGGTAATG       |                                           |
| LOC100631072 | XM_003399472   | Relish                                            | CAGCAGTAAAAATCCCGAC      | CAGCACGAATAAGTGAACATA     |                                           |
| dl           | XM_003402459   | Dorsal                                            | GCTGATGAAGTAAAGAGGC      | GCTTGGTCTGCGTTTATTA       |                                           |
| LOC100631062 | HM142999       | PPO                                               | AGCGGCATAATACGTTGTGT     | CCGAGGGATAGAAAGTCTCC      |                                           |
| LOC100651268 | XM_003401893   | PGRP-SA                                           | CGTGAAGGAGCTCATACCAT     | CCAGGACTCATAGTGGCTGT      | PGRP 2 like (NCBI name)                   |
| LOC100747500 | XM_003493213   | PGRP-SC2                                          | TTGGTTGGCGAAGATGGAAC     | CGCGTTGGATTATGACCAAC      | Based on <i>Bombus impatiens</i> sequence |
| LOC100651417 | XM_003400112   | PGRP-S1                                           | TTTCCATGTTGCTCGCTTCG     | CGCGGTTTCCCTTTGATATTAG    | PGRP-LB (NCBI name)                       |
| LOC100650460 | XM_003401163   | Transferrin                                       | CAATTTCTTACCCTGCTCT      | CCTCGTTATTTGGCTTGCAAT     |                                           |
| LOC100648482 | XM_003399138   | SPN3/4A                                           | GCAGAGACAAATGTTGAAGCAC   | CACAGTCTGGGATAATGAAGAACC  |                                           |
| LOC100631084 | XM_003401944   | Ef-1a-f2                                          | GCTGGTACTCGAAGAACAATC    | GGTGGTTCAACACAATAACCTG    | Housekeeping                              |
| LOC100631077 | XM_003400700   | RPL13                                             | GGTTTAACACAGCAGTAGAAA    | CTTCACAGTCTTGGTGCAA       | Housekeeping                              |
