# Supplementary material for: Royal Decree: Gene Expression in Trans-Generationally Immune Primed Bumblebee Workers Mimics a Primary Immune Response
Source: PubMed Central journal article supplement (PMC4956190; doi:10.1371/journal.pone.0159635), 2016-07-21
Supplement: pone.0159635.s011.pdf [file pone.0159635.s011.pdf]

| Target                         | Induced analysis (NA vs NN) |                |          |                 | Memory analysis (AN vs NN) |                |          |                 |
|--------------------------------|-----------------------------|----------------|----------|-----------------|----------------------------|----------------|----------|-----------------|
|                                | Y-J_lambda                  | t <sub>6</sub> | p        | Fold_expression | Y-J_lambda                 | t <sub>6</sub> | p        | Fold_expression |
| Hymenoptaecin: LOC100631061    | 0.585                       | -47.384        | 0.000000 | 300.014         | 1.673                      | 2.908          | 0.027040 | 4.352           |
| Defensin: LOC100631063         | 0.488                       | -25.265        | 0.000000 | 131.152         | 1.272                      | 2.821          | 0.030315 | 5.906           |
| Abaecin: LOC100631078          | 0.522                       | -11.688        | 0.000024 | 18.749          | 1.39                       | 3.177          | 0.019138 | 2.860           |
| Apidaecin: LOC100649867        | 0.637                       | -14.474        | 0.000007 | 18.382          | 1.514                      | 1.828          | 0.117387 | 2.804           |
| Transferrin: LOC100650460      | 0.547                       | -10.615        | 0.000041 | 10.679          | 0.656                      | 2.509          | 0.045959 | 1.864           |
| BGRP2: LOC100642442            | -0.839                      | -5.234         | 0.001949 | 5.000           | -0.765                     | 3.349          | 0.015435 | 4.618           |
| BGRP1: LOC100647662            | 0.431                       | -3.988         | 0.007219 | 2.299           | 1.064                      | 1.932          | 0.101497 | 1.302           |
| SPN3/4A: LOC100648482          | 0.177                       | -4.171         | 0.005869 | 2.074           | 0.439                      | 0.633          | 0.549958 | 1.370           |
| Apidaecin: LOC100648499        | 4.407                       | -3.820         | 0.008765 | 1.646           | 8.528                      | -0.070         | 0.946285 | 1.018           |
| Relish: LOC100631072           | -1.033                      | -5.002         | 0.002449 | 1.629           | 1.631                      | 0.649          | 0.540523 | 1.089           |
| Aminotransferase: LOC100645702 | 1.03                        | -0.744         | 0.485144 | 1.489           | 1.78                       | 0.865          | 0.420175 | 1.457           |
| PGRP-S1: LOC100651417          | 1.54                        | -2.371         | 0.055475 | 1.436           | 0.987                      | 1.415          | 0.206920 | 1.232           |
| LOC100648224                   | 1.03                        | -0.658         | 0.535038 | 1.381           | 0.479                      | 2.115          | 0.078856 | 1.880           |
| Dorsal: LOC100631054           | 1.354                       | -0.562         | 0.594669 | 1.330           | -1.209                     | 1.899          | 0.106334 | 1.435           |
| LOC100651889                   | -2.101                      | -2.169         | 0.073118 | 1.316           | -0.429                     | 1.447          | 0.198015 | 1.196           |
| PGRP-SC2: LOC100747500(Bimp)   | 0.335                       | -2.096         | 0.080885 | 1.288           | 0.933                      | 1.611          | 0.158290 | 1.309           |
| LOC100643115                   | 0.877                       | -0.521         | 0.620898 | 1.260           | 0.837                      | 0.306          | 0.770234 | 1.139           |
| Laccase-2: LOC100644713        | 1.235                       | -1.008         | 0.352488 | 1.152           | 1.195                      | 2.710          | 0.035108 | 1.533           |
| PPO: LOC100631062              | -1.583                      | -0.336         | 0.748651 | 1.114           | -2.641                     | 0.520          | 0.621849 | 1.021           |
| Battenin: LOC100646374         | 4.602                       | -0.105         | 0.919467 | 1.060           | 1.855                      | 1.726          | 0.135185 | 1.332           |
| PGRP-SA: LOC100651268          | 0.346                       | -0.134         | 0.897876 | 1.057           | 0.014                      | 0.444          | 0.672339 | 1.117           |
| NAD+: LOC100643900             | 2.066                       | 0.615          | 0.560909 | 0.823           | 0.711                      | 0.524          | 0.619233 | 1.147           |
| LOC100644816                   | 0.619                       | 0.770          | 0.470253 | 0.529           | 0.047                      | 0.759          | 0.476532 | 1.697           |
| Venom protease:LOC100642484    | 1.082                       | 1.793          | 0.123222 | 0.337           | 0.567                      | -1.389         | 0.214171 | 0.289           |
| PEPCK: LOC100631088            | 2.16                        | 2.654          | 0.037843 | 0.263           | 1.252                      | -1.416         | 0.206626 | 0.471           |
